# Supplementary material
Source: PubMed Central journal article supplement (PMC3417091)
Supplement: NIHMS341500-supplement-01.pdf [file NIHMS341500-supplement-01.pdf]

Supplementary Table 1. Sensitivity analysis with phosphorylation and dephosphorylation parameters varied separately.

| Parameter   | Base Value                                       | Range                                       |                                             |                                            |
|-------------|--------------------------------------------------|---------------------------------------------|---------------------------------------------|--------------------------------------------|
|             |                                                  | $S = 1 \text{ s}^{-1}$                      | $S = 0.1 \text{ s}^{-1}$                    | $S = 0.01 \text{ s}^{-1}$                  |
| $a_1$       | $10^{-6} \text{ (molecules}\times\text{s)}^{-1}$ | $6.0 \times 10^{-7} - 1.63 \times 10^{-6}$  | $4.3 \times 10^{-7} - 1.65 \times 10^{-6}$  | $9.0 \times 10^{-8} - 1.71 \times 10^{-6}$ |
| $p2_{R1}$   | $10^{-6} \text{ (molecules}\times\text{s)}^{-1}$ | $2.85 \times 10^{-7} - 5.31 \times 10^{-6}$ | $3.11 \times 10^{-7} - 1.51 \times 10^{-5}$ | $3.35 \times 10^{-7} - \infty$             |
| $p2_{R2}$   | $10^{-6} \text{ (molecules}\times\text{s)}^{-1}$ | $0 - 5.31 \times 10^{-6}$                   | $0 - 1.51 \times 10^{-5}$                   | $0 - \infty$                               |
| $p3_{R1}$   | $10^{-6} \text{ (molecules}\times\text{s)}^{-1}$ | $4.32 \times 10^{-7} - 3.36 \times 10^{-6}$ | $4.04 \times 10^{-7} - 9.64 \times 10^{-6}$ | $3.55 \times 10^{-7} - \infty$             |
| $p3_{R2}$   | $10^{-6} \text{ (molecules}\times\text{s)}^{-1}$ | $0 - 3.36 \times 10^{-6}$                   | $0 - 9.64 \times 10^{-6}$                   | $0 - \infty$                               |
| $d_1$       | $0.1 \text{ s}^{-1}$                             | $0 - 0.37$                                  | $0 - 0.7$                                   | $0 - 5.9$                                  |
| $d_2$       | $100 \text{ s}^{-1}$                             | $0.3 - \infty$                              | $0.1 - \infty$                              | $3.2 \times 10^{-3} - \infty$              |
| $p_{scaff}$ | $100 \text{ s}^{-1}$                             | $1.4 - \infty$                              | $0.7 - \infty$                              | $0.125 - \infty$                           |
| $u_1$       | $0.1 \text{ s}^{-1}$                             | $0 - \infty$                                | $0 - \infty$                                | $0 - \infty$                               |
| $u2_{R1}$   | $0.1 \text{ s}^{-1}$                             | $0.01 - 0.51$                               | $0.002 - 0.49$                              | $0 - 0.48$                                 |
| $u2_{R2}$   | $0.1 \text{ s}^{-1}$                             | $0.01 - \infty$                             | $0.001 - \infty$                            | $0 - \infty$                               |
| $u3_{R1}$   | $0.1 \text{ s}^{-1}$                             | $0.0071 - \infty$                           | $10^{-4} - \infty$                          | $0 - \infty$                               |
| $u3_{R2}$   | $0.1 \text{ s}^{-1}$                             | $0.0071 - \infty$                           | $0 - \infty$                                | $0 - \infty$                               |
